# Supplementary material
Source: HighWire-hosted journal article supplement (https://jnm.snmjournals.org/highwire/filestream/95009/field_highwire_adjunct_files/0/171389_Supplemental_Data.pdf)
Supplement: 171389_Supplemental_Data.pdf [file 171389_Supplemental_Data.pdf]

## SUPPLEMENTAL DATA

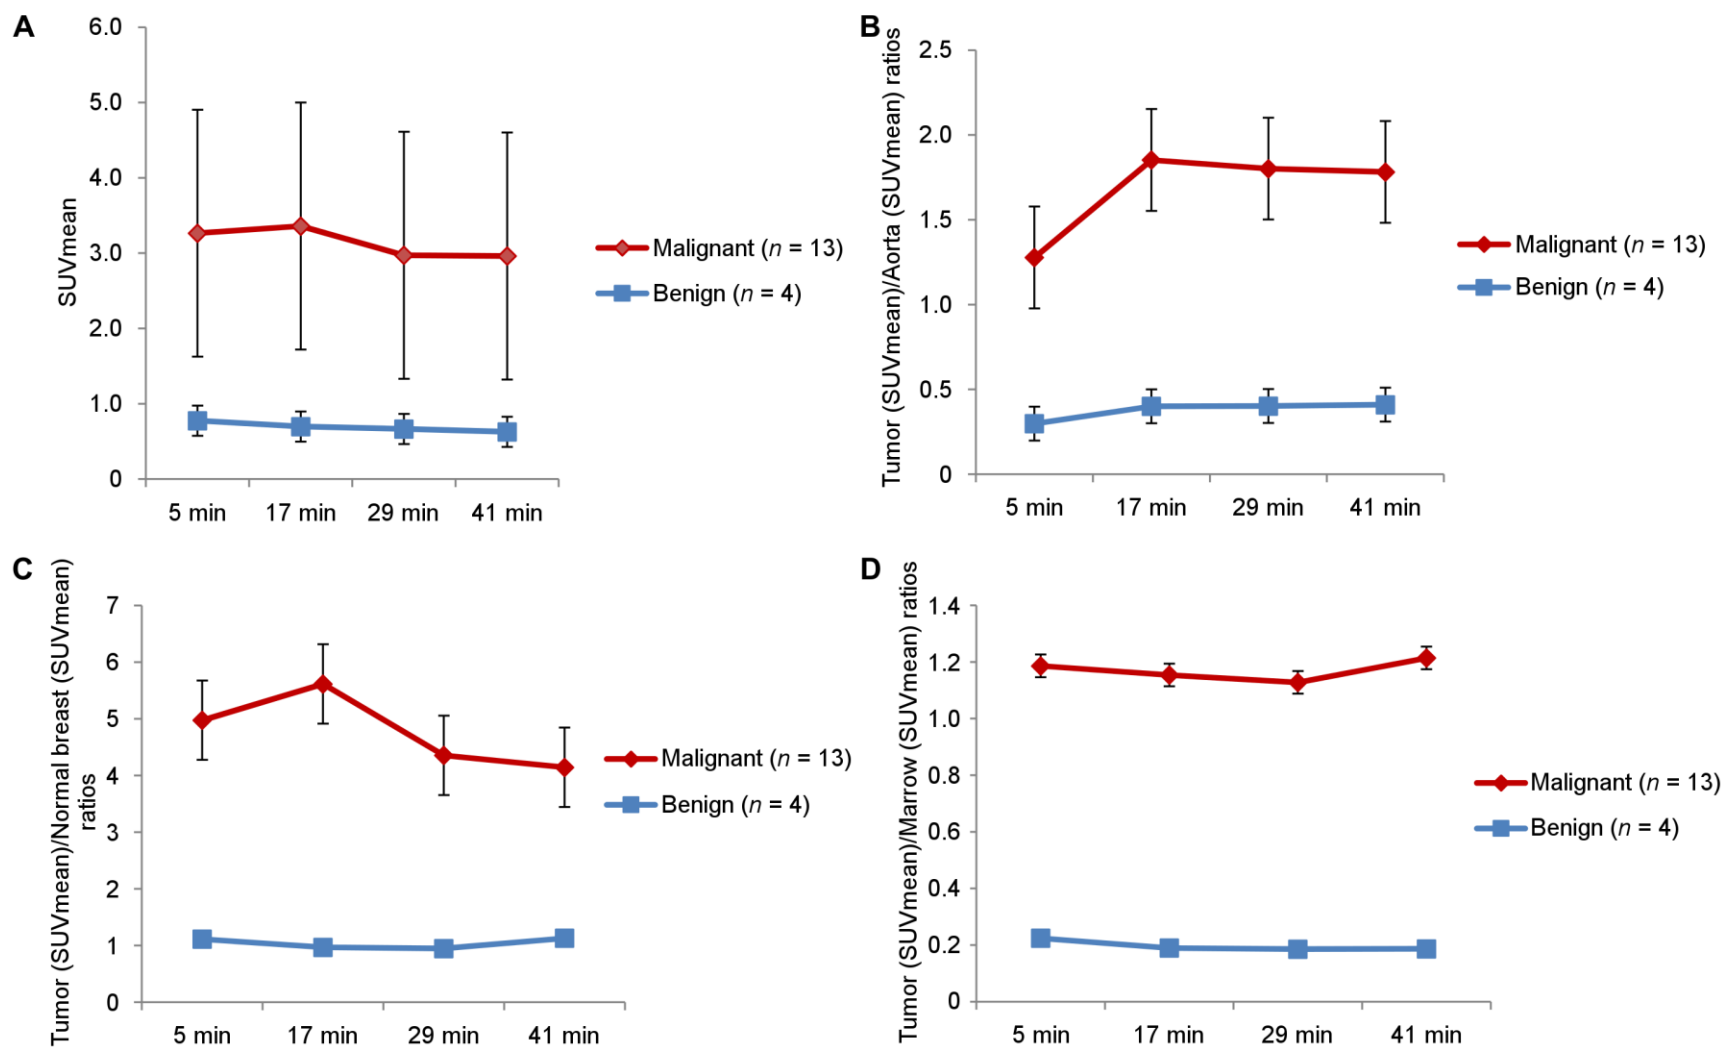

**Supplemental Figure 1.** Using tumor SUVmean to background SUVmean; Fluciclovine uptake in breast tumors [A]; Tumor to aorta ratios ( $p=0.002$ ) [B]; Tumor to normal breast ratios ( $p=0.002$ ) [C] and Tumor to marrow ratios ( $p<0.0001$ ) [D] in malignant compared to benign breast tumors

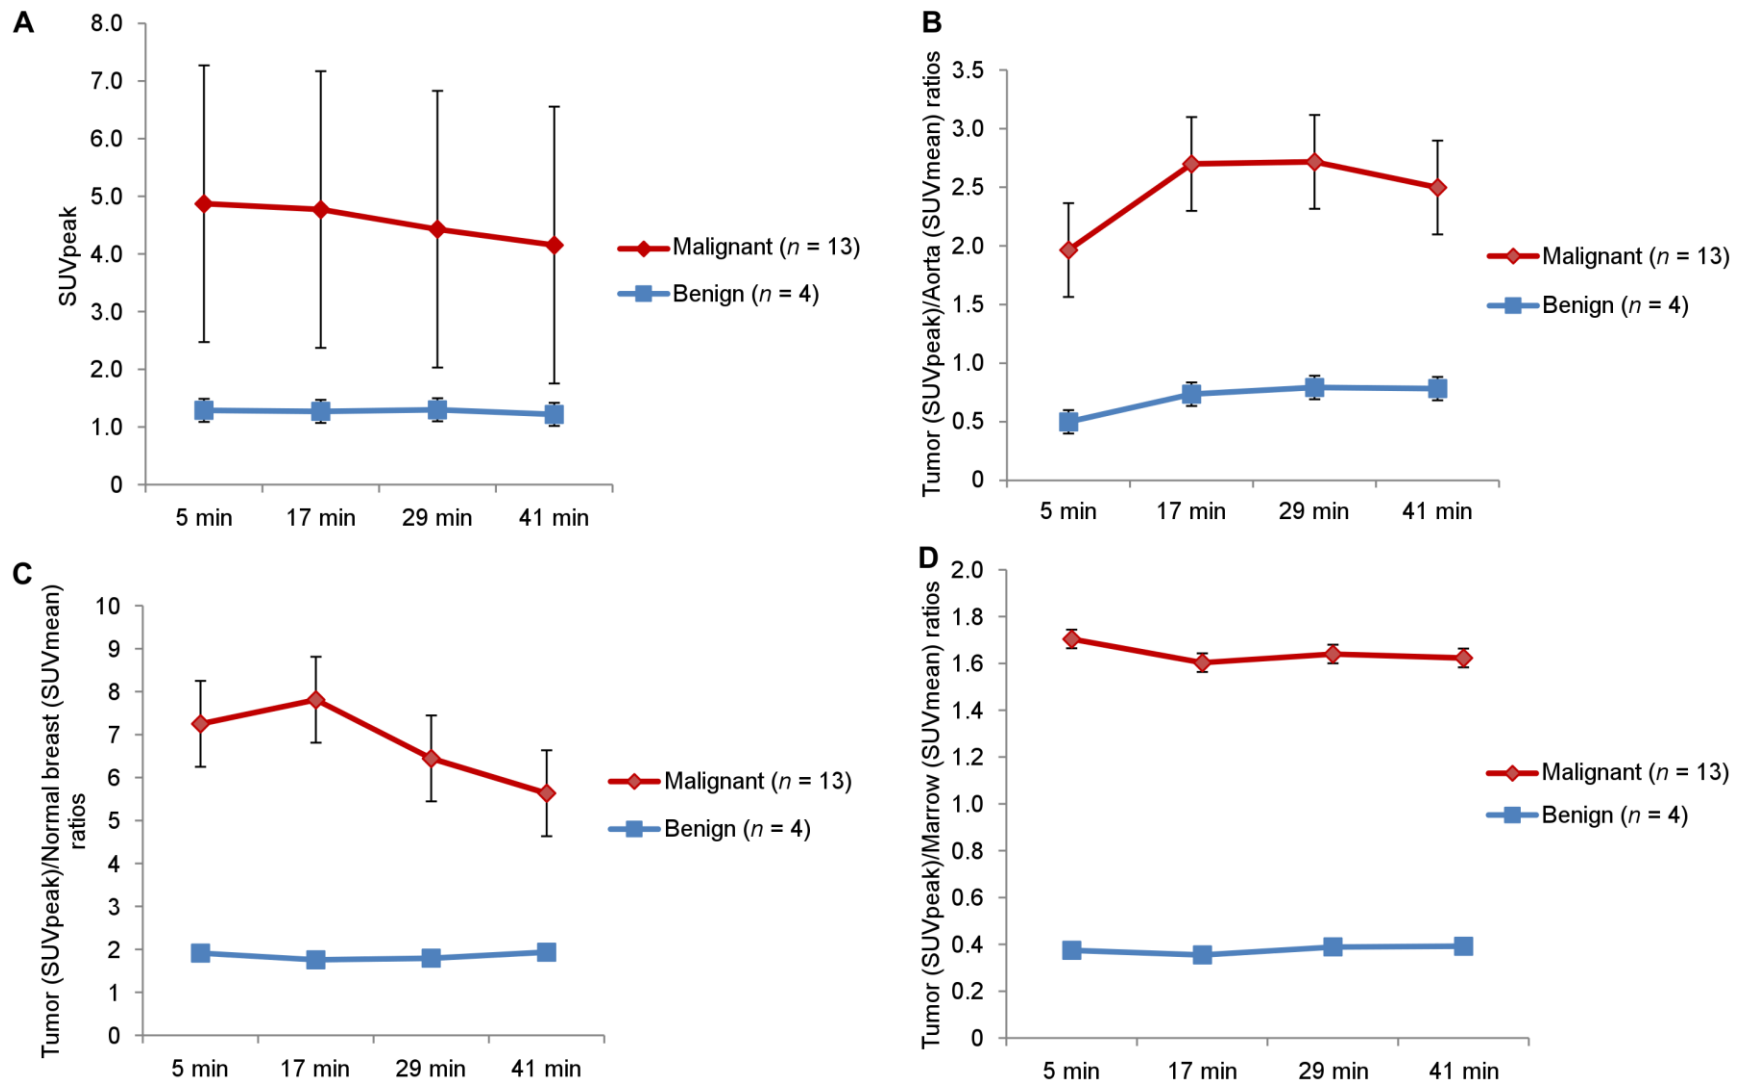

**Supplemental Figure 2.** Using tumor SUVmean to background SUVmean; Fluciclovine uptake in breast tumors [A]; Tumor to aorta ratios ( $p=0.0007$ ) [B]; Tumor to normal breast ratios ( $p=0.002$ ) [C] and Tumor to marrow ratios ( $p<0.0001$ ) [D] in malignant compared to benign breast tumors

**Supplemental Table 1: Demographics, histologic and immunohistochemical characteristics of breast tumors in 12 patients**

| Subject ID | Age (yrs) | Histologic diagnosis                                                 | Ki-67 (%)         | Fluciclovine uptake (SUVmean) |           |           |           | Fluciclovine uptake (SUVpeak) |           |           |           |
|------------|-----------|----------------------------------------------------------------------|-------------------|-------------------------------|-----------|-----------|-----------|-------------------------------|-----------|-----------|-----------|
|            |           |                                                                      |                   | 5-10mins                      | 17-20mins | 29-32mins | 41-44mins | 5-10mins                      | 17-20mins | 29-32mins | 41-44mins |
| 1          | 63        | IDC grade 2; ER+/PR+/HER2-                                           | High (21)         | 3.2                           | 3.1       | 3         | 2.3       | 4.0                           | 3.7       | 3.5       | 1.7       |
|            |           | NA*                                                                  | NA                | 0.7                           | 0.8       | 0.9       | 0.8       | 1                             | 1.0       | 1.2       | 1         |
| 2          | 50        | Ductal hyperplasia and columnar cells with micro-calcifications      | NA                | 1.1                           | 0.8       | 0.7       | 0.7       | 1.5                           | 1.3       | 1.3       | 1.1       |
| 3          | 67        | IDC grade 1; ER+/PR+/HER2-                                           | High (29)         | 2.9                           | 5.0       | 3.7       | 3.4       | 6.3                           | 4.8       | 3.8       | 3.3       |
| 4          | 77        | IDC grade 2; ER+/PR-/HER2+                                           | Intermediate (11) | 2.1                           | 2.6       | 2.7       | 2.7       | 2.3                           | 2.8       | 2.9       | 3.1       |
|            |           | Fibroadipose tissue                                                  | NA                | 0.5                           | 0.5       | 0.3       | 0.3       | 1.0                           | 1.1       | 1.2       | 1.3       |
| 5          | 60        | ILC grade 2; ER+/PR+/HER2-                                           | High (45)         | 2.3                           | 2.1       | 1.9       | 1.7       | 2.6                           | 2.5       | 2.5       | 2.5       |
|            |           | IDC grade 3; ER+/PR-/HER2-                                           | High (97)         | 3.9                           | 3.7       | 3.3       | 2.9       | 6.0                           | 6.4       | 5.8       | 5.0       |
| 6          | 54        | IMC; ER-/PR-/HER2-                                                   | High (62)         | 1.3                           | 1.3       | 1.2       | 1.3       | 6.8                           | 6.7       | 6.7       | 6.8       |
|            |           | Fibrocystic change, apocrine metaplasia and focal ductal hyperplasia | NA                | 0.8                           | 0.7       | 0.7       | 0.8       | 1.7                           | 1.6       | 1.5       | 1.        |
| 7          | 60        | IDC grade 3; ER+/PR-/HER2-                                           | High (95)         | 4.7                           | 3.7       | 3.1       | 2.7       | 6.1                           | 4.9       | 4.2       | 3.8       |
| 8          | 89        | IDC grade 3; ER+/PR+/HER2-                                           | High (40)         | 5.1                           | 5.8       | 4.5       | 5.7       | 7.6                           | 8.1       | 8.2       | 8.1       |
|            |           | IDC grade 3; ER-/PR-/HER2-                                           | High (34)         | 7.0                           | 6.7       | 6.5       | 6.9       | 9.9                           | 10.0      | 8.5       | 8.9       |
| 9          | 68        | ILC grade 2; ER+/PR+/HER2-                                           | High (39)         | 5.1                           | 4.6       | 4.0       | 4.0       | 5.4                           | 5.0       | 4.6       | 4.4       |
| 10         | 54        | ILC grade 1; ER+/PR-/HER2-                                           | High (15)         | 1.7                           | 1.5       | 1.2       | 1.3       | 1.7                           | 1.3       | 0.9       | 0.7       |
| 11         | 73        | ILC grade 1; ER+/PR+/HER2-                                           | Low (2)           | 1.6                           | 2.0       | 2.0       | 2.1       | 2.2                           | 2.7       | 2.9       | 3.1       |
| 12         | 49        | ILC grade 2; ER+/PR+/HER2-                                           | High (25)         | 1.6                           | 1.7       | 1.6       | 1.6       | 2.4                           | 3.03      | 3.0       | 2.6       |

Note: NA- Not applicable; \* - Confirmed on conventional imaging

IDC- Invasive ductal carcinoma, ILC – Invasive lobular carcinoma; IMC – Invasive metaplastic carcinoma; ER – Estrogen receptor; PR – Progesterone receptor; HER2 receptor – Human epidermal growth factor receptor 2
